1 **A WHOLE-BRAIN 3D MYELOARCHITECTONIC ATLAS: MAPPING THE**  
2 **VOGT-VOGT LEGACY TO THE CORTICAL SURFACE**

3 Niels A. Foit MD<sup>1,2</sup>, Seles Yung<sup>1</sup>, Hyo Min Lee<sup>1</sup>, Andrea Bernasconi MD<sup>1</sup>, Neda Bernasconi  
4 MD PhD<sup>1\*</sup>, Seok-Jun Hong PhD<sup>1,3,4,5\*</sup>

5 <sup>1</sup>*Neuroimaging of Epilepsy Laboratory, McConnell Brain Imaging Center, Montreal Neurological Institute, Montreal, QC,*  
6 *Canada;* <sup>2</sup>*Department of Neurosurgery, Medical Center - University of Freiburg, Freiburg, Germany;* <sup>3</sup>*Center for Neuroscience*  
7 *Imaging Research, Institute for Basic Science, Suwon, Korea;* <sup>4</sup>*Department of Biomedical Engineering, Sungkyunkwan*  
8 *University, Suwon, Korea;* <sup>5</sup>*Center for the Developing Brain, Child Mind Institute, NY, USA*

9

10

11

12 **Short title –Myeloarchitectonic MRI atlas**

13

14 175 words in abstract / main text

15

16 3 color Figures; 3 tables

17 **Classifications (1 minor / 1 major): Biological Sciences, Neuroscience**

18 **Key words:** Myeloarchitecture, MNI space, intracortical depth profiling, FreeSurfer

19

20 \*) These authors share senior authorship of the manuscript.

21

22

23 **CORRESPONDING AUTHOR**

24 Seok-Jun Hong, PhD

25 Center for Neuroscience Imaging Research

26 Department of Biomedical Engineering

27 Sungkyunkwan University, Suwon, 16419, Korea

28

29 Center for the Developing Brain

30 Child Mind Institute, NY, USA

31 hongseokjun@skku.edu

32

33

34

## 35 **FUNDING SOURCES**

36 This project was funded by CIHR MOP-57840 to AB and CIHR MOP-123520 to NB,  
37 Natural Sciences and research Council (NSERC; Discovery-243141 to AB and 24779  
38 to NB), Epilepsy Canada Jay and Aiden Barker grant (247394 to AB), Canada First  
39 Research Excellence Fund (HBHL-1a-5a-06 to NB) and the German Research  
40 Foundation (DFG, FO996/1-1 to NAF), the Brain & Behavior Research Foundation  
41 (NARSAD Young Investigator Award #28436) and the Institute for Basic Science  
42 (IBS-R15-D1 to SJH). The funders had no role in the design of the study, collection,  
43 analyses, or interpretation of data, writing of the manuscript or the decision to publish  
44 the results.

45

## 46 **CRedit author roles**

- 47 • Niels A. Foit: data curation, methodology, formal analysis, interpretation of data,  
48 manuscript writing and editing.
- 49 • Seles Yung: structure segmentation, formal analysis
- 50 • Hyo-Min Lee: manuscript reviewing and editing
- 51 • Andrea Bernasconi: supervision, methodology, interpretation of data, manuscript  
52 reviewing and editing.
- 53 • Neda Bernasconi: supervision, methodology, interpretation of data, manuscript  
54 reviewing and editing
- 55 • Seok-Jun Hong: data curation, supervision, methodology, formal analysis,  
56 manuscript writing, reviewing and editing

57

## 58 **Declaration of interests**

59 The authors declare that there is no conflict of interest related to this manuscript.

60

61 **Abstract**

62 Building precise and detailed parcellations of anatomically and functionally distinct  
63 brain areas has been a major focus in Neuroscience. Pioneer anatomists parcellated  
64 the cortical manifold based on extensive histological studies of post-mortem brain,  
65 harnessing local variations in cortical cyto- and myeloarchitecture to define areal  
66 boundaries. Compared to the cytoarchitectonic field, where multiple neuroimaging  
67 studies have recently translated this old legacy data into useful analytical resources,  
68 myeloarchitectonics, which parcellate the cortex based on the organization of  
69 myelinated fibers, has received less attention. Here, we present the neocortical  
70 surface-based myeloarchitectonic atlas based on the histology-derived maps of the  
71 Vogt-Vogt school and its 2D translation by Nieuwenhuys. In addition to a  
72 myeloarchitectonic parcellation, our package includes intracortical laminar profiles of  
73 myelin content based on Vogt-Vogt-Hopf original publications. Histology-derived  
74 myelin density mapped on our atlas demonstrate close overlap with *in vivo*  
75 quantitative MRI markers for myelin and relates to cytoarchitectural features.  
76 Complementing the existing battery of approaches for digital cartography, the whole-  
77 brain myeloarchitectonic atlas offers an opportunity to validate imaging surrogate  
78 markers of myelin in both health and disease.

79 **Highlights (will go as a separate file)**

- 80       • Our myeloarchitectonic atlas builds on extensive meta-analyses-derived and  
81       ground-truth histological data.
- 82
- 83       • Our atlas provides qualitative and quantitative 3D information on cortical  
84       myelin architecture.
- 85
- 86       • MRI surrogate markers of myelin demonstrate close overlap with histological  
87       cortical parcellations, supporting biological validity of non-invasive metrics.
- 88
- 89       • This atlas can be seamlessly integrated into widely used neuroimaging  
90       analysis software to inform studies in health and disease.

## 91 **Introduction**

92 Obtaining precise and detailed parcellations of anatomically and functionally distinct  
93 brain areas has been the focus of Neuroscience research for over a century (Zilles et  
94 al., 2015; Zilles and Amunts, 2010). Among neuroanatomists of the early 20<sup>th</sup> century,  
95 Brodmann, Vogt and Vogt, and von Economo and Koskinas ardently worked towards  
96 generating highly detailed histological maps of the human cortex based on post-  
97 mortem data (Triarhou, 2007; Zilles and Amunts, 2010). To parcellate the neocortex,  
98 they relied on cytoarchitectonics, characterizing size, shape and distribution of cell  
99 bodies across cortical layers (Amunts et al., 2005; Smith, 1927; Triarhou, 2007), and  
100 myeloarchitectonics, which studies layering, arrangement, packing and density of  
101 myelinated fibers and bundles (Batsch, 1955; Hopf, 1968; Nieuwenhuys, 2013;  
102 Strasburger, 1937; Vogt and Vogt, 1919). These histology-derived maps have set the  
103 basis for MRI-derived *in vivo* parcellations of cortical boundaries (Huntenburg et al.,  
104 2017; Mendes et al., 2019; Nieuwenhuys and Broere, 2020). Nevertheless, knowledge  
105 on cytoarchitectonics today remains heavily influenced by the classic work of  
106 Brodmann (Brodmann, 1907; Zilles and Amunts, 2010) and many contemporary  
107 neuroimaging toolkits contain modified versions of Brodmann's seminal map  
108 (Eickhoff et al., 2005; Talairach et al., 1993).

109 Compared to the cytoarchitectonic field, myeloarchitectonics has received less  
110 attention. This may be due to the paucity of histology-based myeloarchitectonic data  
111 to establish the biological substrates of several MRI markers for myelin  
112 characteristics (Lazari and Lipp, 2021; van der Weijden et al., 2020), such as  
113 quantitative T1 mapping (Lutti et al., 2014; Marques et al., 2017) and neurite  
114 orientation and dispersion density imaging (Zhang et al., 2012). Recently,  
115 Nieuwenhuys and co-workers (Nieuwenhuys and Broere, 2017) mapped Vogts

116 myeloarchitectonic atlases to a non-digital, 2D representation of the Montreal  
117 Neurological Institute (MNI) Colin27 brain template, by means of manual translations  
118 from paper-embedded figures. Harnessing the data generated by Hopf, they further  
119 integrated area-specific myelin fiber density estimates into their myeloarchitectonic  
120 map (Hopf, 1968, 1957, 1956, 1955; Nieuwenhuys and Broere, 2017).

121 While 2D maps render the knowledge from historical postmortem data more  
122 accessible, they cannot be used in quantitative neuroimaging analyses, which usually  
123 require 3D stereotaxic volumetric data representation or cortical surface formats. In an  
124 effort to address this gap, we built a 3D myeloarchitectonic atlas (MYATLAS) in  
125 common space, translating the Nieuwenhuys' boundaries of the Vogt-Vogt atlas to the  
126 Colin27 brain template and standard cortical surfaces. Besides providing a *ready-to-*  
127 *use* myeloarchitectonic parcellation, we generated intracortical laminar profiles of  
128 myelin content from the photometric data gathered from Vogt-Hopf publications. To  
129 validate our atlas, we quantified the similarity between the histology-based myelin  
130 density and profiles from *in vivo* MRI markers obtained from MP2RAGE-derived  
131 qT1 mapping (21, 34, 35). Moreover, we integrated cytoarchitectonic features  
132 (Scholtens et al., 2018). Finally, to facilitate integration into existing image  
133 processing pipelines, the proposed myeloarchitectonic atlas together with source  
134 codes are made publicly available.

135

## 136 **Materials and Methods**

137 After a short review of prior work, sections below detail the methodology used for the  
138 creation of our 3D myeloarchitectonic atlas (MYATLAS) and necessary processing  
139 steps to obtain cortical depth profiles from Vogt-Vogt myeloarchitectonic  
140 parcellations, as well as cross-modal correlations between myelo- and

141 cytoarchitectural features and *in vivo* qT1 mapping. We further provide instructions  
142 for registering the MYATLAS to individual MRI data.

### 143 Summary of prior work

144 Nieuwenhuys and co-workers recently performed a meta-analysis on potential  
145 usability of the historical myeloarchitectural data aggregated from Vogts' papers (see  
146 Nieuwenhuys and Broere, 2017 for details). The original cortical division by the  
147 Vogts school consisted of a total of 180 myeloarchitectonic cortical fields (64 frontal,  
148 30 parietal, 63 temporal, 17 occipital, and 6 insular areas). Their associates Hopf and  
149 Vitzthum further refined this work by subdividing the parietal and occipital lobes into  
150 multiple sub-areas (Hopf, 1957, 1956, 1955), resulting in 214 regions (64 frontal, 60  
151 parietal, 63 temporal, 21 occipital, and 6 insular). Nieuwenhuys et al. applied semi-  
152 automatic topological translations and boundary averaging across 17 different views  
153 of this analog dataset to project myeloarchitectonic parcellations onto the MNI-  
154 Colin27 single subject brain in a non-digital figure format (**Figure 1**).

155 In addition to boundaries, the Vogts investigated intracortical penetration patterns of  
156 tangential and radial fiber bundles across cortical laminae (Vogt and Vogt, 1919).  
157 They defined major categories of myeloarchitectonic profiles based on two criteria  
158 (**Figure 2A**). The first criterion related to the presence of transverse, densely  
159 myelinated cortical layers (the bands of Baillarger). Accordingly, cortical specimens  
160 can be classified into 4 categories: *bistriate* (two horizontal myelin-rich bands),  
161 *unistriate* and *unitostriate* (both indicating only one visible band; for the former, a  
162 single cortical layer is covered, whereas for the latter multiple layers are covered by  
163 the band), and *astriate* (no striation). Notably, each category has a subtype, depending  
164 on the demarcation of a band boundary (*propebistriate*: barely recognizable bands of  
165 Baillarger; *propeunistriate*: ill-defined border of inner stripe; *propeastriate*: slight

166 decrease of density in 5a/6a). The second criterion relates to the intrusion depth of the  
167 radiate bundles across cortical laminae, further classifying the cortex into *euradiate*  
168 (bundles reaching upper border of layer 3b), *infraradiate* (reaching upper border of  
169 layer 5b), and *supraradiate* (extending into layers 1-2).

170 Following this work, Hopf (Hopf, 1968, 1957, 1956, 1955) further advanced these  
171 myeloarchitectonic parcellation by systematically recording frontal, parietal and  
172 temporal lobe myelin contents using analog photodensitometry. Notably, each region  
173 has distinct light absorption curves, or cortical depth profiles. This data was recently  
174 digitized by Nieuwenhuys (Nieuwenhuys and Broere, 2017), who introduced *mean*  
175 *grey levels* (MGL), *i.e.*, digital quantifications of myelin fiber density per cortical  
176 area. Ranging from 0 to 255, lower values indicate densely myelinated areas, while  
177 high MGL are found in lightly myelinated areas (Edwards et al., 2018; Nieuwenhuys  
178 and Broere, 2017). Since MGL are only available for the frontal, parietal and temporal  
179 lobes, remaining areas were assigned 255 as a default value. Since Hopf based his  
180 work exclusively on the right hemisphere, MGL were available only for the right  
181 hemisphere in Nieuwenhuys' work (Nieuwenhuys and Broere, 2017).

182

### 183 *MRI processing*

184 We created a stereotaxic average of the individual Colin27 brain MRIs, comprising 27  
185 T1 weighted scans with 1mm isotropic voxel resolution (Holmes et al., 1998). We  
186 then extracted 3D cortical surface models from this template using FreeSurfer (Fischl,  
187 2012). Briefly, processing steps included gradient non-uniformity correction (Jovicich  
188 et al., 2006), registration to MNI stereotaxic space, intensity normalization, skull  
189 stripping, and segmentation into tissue classes (Fischl et al., 2004). Gray-white and  
190 gray-CSF interface models were generated through triangular surface tessellation



191 yielding 163,842 vertices (Dale et al., 1999), followed by topology correction,  
192 inflation, and spherical registration to fsaverage (Fischl et al., 2001).

193 *2D-to-3D translation of myeloarchitectural parcellations.*

194 As per previous procedures (Pijnenburg et al., 2021; Scholtens et al., 2015), the  
195 original Nieuwenhuys' illustration (Nieuwenhuys et al., 2015) was split into eight  
196 view planes (lateral, medial, superior, inferior, orbitofrontal, supratemporal, parietal  
197 opercular, insular). Carefully cross-referencing different views, a single rater (SY)  
198 labeled each parcellation by comparing geometric landmarks between Nieuwenhuys'  
199 illustrations and the convexity of the 3D Colin27 brain surface. Labelling was  
200 performed with “*tksurfer*” ([surfer.nmr.mgh.harvard.edu/fswiki/TkSurfer](http://surfer.nmr.mgh.harvard.edu/fswiki/TkSurfer)). Notably,  
201 identifiable sulci on the original 2D Colin27 map such as the central and superior  
202 temporal sulcus served as systematic landmarks. To optimize anatomical matching of  
203 area boundaries, we further relied on the main sulcal patterns surrounding each region  
204 to be labeled. A second rater (SJH) evaluated accuracy of each label. For ambiguous  
205 areas, *i.e.*, either a mismatch across view planes, or between 2D illustrations and 3D  
206 cortical surface, an inter-rater consensus on boundaries was reached to minimize  
207 discrepancies by carefully reviewing the original publications and applying manual  
208 corrections, if necessary (**Supplementary Table 1**).

209 An inherent limitation of Vogt-Vogt histological data is that all results were reported  
210 on the convex pial surface, which does not reveal buried sulci. We thus labelled areas  
211 located within these sulci on the white matter surface view on which they are clearly  
212 visible and intra-sulcal boundaries can be easily delineated at their bottom. To  
213 visualize areas hidden in the depths of the Sylvian fissure (*i.e.*, insula, supratemporal  
214 lobe, parietal operculum), invisible even on the white matter surface, we extracted  
215 patches of their surfaces, delineated label boundaries and merged them back to the

216 whole-brain data. Notably, some areas appeared multiple times across view planes,  
217 preventing their segmentation into a single coherent label. This was addressed by  
218 dividing areas into sub-regions; for example, for area 111 appearing differently in the  
219 lateral and medial views, we divided it into 111-l, 111-m, ‘l’ and ‘m’ refer to medial  
220 and lateral, respectively (see **Supplementary Table 1**). Finally, resulting labels were  
221 numbered in accordance to Vogt’s numeric convention and merged with color tables  
222 to create a single Freesurfer annotation file (.annot), which contains a total of 214  
223 parcellations (**Figure 1C**).

224

### 225 Quantitative cortical myelin content and intracortical depth profiling

226 MRI allows for *in vivo* quantification of myelin content of the cortical manifold  
227 (Stüber et al., 2014; Waehnert et al., 2014). However, validation requires access to  
228 histology, which has not been available in a digital format. We thus generated  
229 histology-derived quantitative myelin data by recording the MGL index (the averaged  
230 myelin fiber density) for each cortical field (Nieuwenhuys and Broere, 2017) and  
231 created a *ready-to-analyze* look-up table in excel format for the use with the  
232 MYATLAS (**Supplementary Material 1**, “Myeloarchitectural\_table.xlsx”). As the  
233 MGL for the insula and occipital lobes (34 parcels) were unavailable, they were  
234 omitted, totaling 187 values (64 frontal, 60 parietal and 63 temporal areas;  
235 **Supplementary Material 1**). We then mapped the myelination density (MGL values)  
236 onto the MYATLAS (**Figure 1**).

237 To extract myelin laminar depth profiles from histologically-stained  
238 microphotographs (Batsch, 1955; Brockhaus, 1940; Hopf, 1957, 1956, 1955;  
239 Strasburger, 1937; Vogt and Vogt, 1919), we screen-captured the histology photos  
240 with a fixed format and size, and estimated the gray level intensity across cortical

241 laminae as a surrogate of myelin density. The digitized histological figures were  
242 normalized to make intensity values across photos comparable. Absolute gray values  
243 were then extracted and plotted as a normalized depth profile across all cortical layers  
244 (**Figure 2B**). Information on myeloarchitectonic features, such as fiber bundle types  
245 and layer-specific density of each cortical stain, were also recorded (**Supplementary**  
246 **Material 1, Figure 2C**).

247

#### 248 *Correlation between myeloarchitectonic features and in-vivo myelin proxy data*

249 We cross-validated myeloarchitectonic features through associations with qT1  
250 mapping (Edwards et al., 2018; Mancini et al., 2020; Weiskopf et al., 2015).  
251 Compared to conventional weighted sequences, MP2RAGE-derived qT1 images are  
252 inherently uniform, theoretically free of other imaging properties like proton density  
253 or T2\*, and are acknowledged as directly relating to cortical myelin content (Marques  
254 et al., 2017; Marques and Gruetter, 2013; van der Weijden et al., 2020). For qT1  
255 sampling, we selected the 202 individuals from the Leipzig Study for Mind-Body-  
256 Emotion Interactions (LEMON) dataset (Babayan et al., 2019). Details of LEMON  
257 acquisition protocols and preprocessing steps have been described in detail (Mendes  
258 et al., 2019).

259 To correlate the depth of profiles acquired from digitized histological data  
260 microphotographs with *in vivo* intracortical qT1, we positioned 10 equivolume  
261 surfaces between the inner and outer cortical interface using  
262 *equivolumetric\_surfaces.py* ([https://github.com/kwagstyl/surface\\_tools.git](https://github.com/kwagstyl/surface_tools.git)). These  
263 surfaces systematically sampled the axis perpendicular to the cortical ribbon, with  
264 interpolation at each vertex (Hong et al., 2017, 2016).

#### 265 *Correlation of myelin content with von Economo-Koskinas cytoarchitectonic data*

266 To verify the neurobiological significance of MYATLAS, we correlated the MGL  
267 with von Economo-Koskinas' cytoarchitectonic features of *gyral dome thickness*,  
268 *cellular density* and *cell size* (Scholtens et al., 2018, 2015). Since *gyral dome*  
269 *thickness* is reported as a range, region-specific averages were calculated. *Cellular*  
270 *densities* were averaged across all cortical layers, whereas *cell size* was calculated  
271 according to  $[H_{\text{mean}} \times W_{\text{mean}}]$ ; with  $H_{\text{mean}}$  (Height) =  $[H_{(\text{min-max})}/2]$  and  $W_{\text{mean}}$  (Width) =  
272  $[W_{(\text{min-max})}/2]$  per individual cortical layer and then averaged across all layers. To  
273 allow for between-atlas correlation, we matched the boundary of parcels using a  
274 winner-takes-all approach to assign each parcel of the von Economo-Koskinas' atlas  
275 to our parcellation.

276

#### 277 *Use of the MYATLAS and associated features*

278 All parcellations and MGL maps are available in two widely used formats (gifti and  
279 nifti [*'dlabel'* for MGL and *'dscalar'* for parcellation]) and two brain spaces (Colin27  
280 and Conte69, both with 32k vertices). We further provide the original, manual parcel  
281 translation file (*'rh.vogt\_vogt.annot'*) for use with FreeSurfer. Finally, to facilitate  
282 implementation, we also provide Bash scripts which convert the original labels from  
283 the MNI-Colin27 brain to single-subject space using FreeSurfer *'mri\_label2label'*  
284 (*mapping\_colin27\_labels\_onto\_individuals[\_batch].sh*). Finally, we generated a  
285 flipped version of the left hemisphere atlas based on symmetric hemispheric  
286 registration (*'xhemi'* command in FreeSurfer).

287

288 **Results**

289 3D myeloarchitectonic atlas

290 The MGL patterns were similar between the MYATLAS and the Nieuwenhuys map  
291 (**Figure 1**). Indeed, the lowest MGL values were found in highly myelinated primary  
292 sensory areas (somatosensory areas 67, 69–71II of the postcentral gyrus; auditory  
293 cortex, areas 145–157) and primary motor cortices (areas 39, 42, 43). Notably, similar  
294 to Vogt’s observation of continuous changes of architectural features, our 3D map  
295 displayed gradually decreasing myelin content in areas distant from primary cortices.  
296 Reflecting this pattern, higher-order areas (including areas 49-51 of the frontal pole)  
297 and precuneus (areas 81-85) revealed higher MGL (*i.e.*, less myelination), compared  
298 to the rest of the brain. There were some noteworthy exceptions to this pattern of  
299 hierarchy-dependent myelin profiles, previously recognized by Vogt, with densely  
300 myelinated clusters, comprising the orbitofrontal (60 and 61), intraparietal (86, 87),  
301 and posterolateral (169-172) and basal (173-177, 179-180) temporal areas. These  
302 clusters have also been consistently identified both *ex vivo* and on structural MRI  
303 (Glasser and Van Essen, 2011; Nieuwenhuys and Broere, 2017), all relating to visual  
304 processing (Nieuwenhuys and Broere, 2017). Notably, areas 173,174 177,179-80  
305 correspond to two newly discovered distinct cytoarchitectonic areas FG3 and FG4 of  
306 the fusiform gyrus (Lorenz et al., 2017).

307

308 Intracortical depth profiling based on Vogt-Vogt classifications

309 **Figure 2A-B** illustrate 3D maps of fiber penetration patterns derived from Vogt-Hopf  
310 studies stratified with respect to the presence of the bands of Baillarger and bundle  
311 intrusion types (see **Method** ‘*prior work*’ for stratification details). Specifically,  
312 within available areas, high-order cognitive regions showed either the *unistriate*

313 (temporal and frontal areas) or *bistriate* (parietal) subtype. In contrast, the bundle  
314 intrusion types were relatively homogeneous, with majority of the areas containing  
315 the *euradiate* subtype. **Figure 2C** shows patterns of myelination density across lobes.

316

### 317 Correlation between surface-mapped MGL and in vivo myelin metrics

318 We found a positive correlation between our histology-derived MGL and *in vivo* qT1  
319 values ( $p < 5 \times 10^{-7}$ ,  $r = 0.39$ ), indicating close correspondence between these surrogate  
320 metrics of myelin. **Figure 3A** illustrates the group-averaged qT1 map of 202 subjects  
321 selected from the LEMON dataset (Babayán et al., 2019). The lowest qT1 values were  
322 found in heavily myelinated primary cortices, with a decrease when moving towards  
323 higher order areas. Notably, low qT1 values found in the posterolateral temporal lobe  
324 likely indicate the dense myelination of the dark cluster described by Vogt  
325 (Nieuwenhuys and Broere, 2017). **Figure 3B** illustrates the correspondence between  
326 photodensitometric quantifications of cortical myelin content and *in vivo* qT1 depth  
327 profiles.

328

### 329 Correlation between surface-mapped MGL and cytoarchitectonic features

330 Only cell size was found to correlate with myelin density as represented by MGL ( $r =$   
331  $-0.27$ ,  $p < 0.0001$ ; **Figure 3C**), where smaller cell sizes were associated with higher  
332 myelin density. While *gyral dome thickness* trended towards a similar relationship ( $r$   
333  $= -0.12$ ,  $p < 0.09$ ), *cell density* did not ( $r = 0.03$ ,  $p > 0.7$ ). These findings are in line  
334 with previous studies showing that axons of smaller sensory neurons are often  
335 unmyelinated (Lee et al., 1986, p. 198). Notably, pyramidal axons of the central motor  
336 cortex exhibit complex myelination patterns (Micheva et al., 2016), which differ  
337 between cortical layers (Tomassy et al., 2014). Thus, it is conceivable that these

338 complex interactions might not be captured by the limited resolution of a simplified  
339 metric such as MGL.

340

#### 341 Code and Data availability

342 The MYATLAS, lookup tables, source codes and the scripts for applying the atlas to  
343 Colin27 and Conte69 brain templates as well as to individual brains  
344 (“*mapping\_colin27\_labels\_onto\_individuals\_batch.sh*”) are available from this link  
345 (<https://bic.mni.mcgill.ca/~noel/noel-myelin>). A README file together with detailed  
346 descriptions of the downloadable files are available from the same web repository. All  
347 imaging-derived files are in FreeSurfer MGH and NIFTI formats and can be viewed  
348 with standard software (*e.g.*, FreeView, FSLEyes or *wb\_view*). The scripts used for  
349 data processing are available from the authors upon request.

350

#### 351 **Discussion**

352 Digital reconstructions of histological brain atlases constitute an important resource  
353 for contemporary neuroimaging. Such reconstructions expand availability of  
354 previously inaccessible, yet highly comprehensive, observations. Building upon the  
355 Vogt legacy, we present the MYATLAS, a 3D myeloarchitectonic digital cartography  
356 to assist neuroimaging mapping studies. To facilitate broad application, we provide  
357 the atlas together with the codes and data files. Moreover, to mitigate inter-individual  
358 variability, the parcellations and MGL maps are available both on a single- and a  
359 multi-subject group templates in stereotaxic space. Integration of detailed,  
360 quantitative data on cortical myelination will allow future neuroimaging research to

361 assess their findings based on both myelin density and microstructure, enhancing  
362 biological validity.

363 Variations in myelination relate to various aspects of neocortical structure and  
364 function, including connectivity and hierarchical processing (Boshkovski et al., 2021;  
365 Huntenburg et al., 2017; Royer et al., 2020). Moreover, disrupted myeloarchitectural  
366 properties may reflect the pathological underpinning of neurological disorders (Nord  
367 et al., 2019). Thus, classification of cortical myeloarchitectonic areas and patterns  
368 through parcellation and MGL mapping has significant translational potential in both  
369 health and disease. Future neuroimaging studies may leverage this information to  
370 elucidate pathological whole-brain myeloarchitectural patterns, for instance in  
371 multiple sclerosis (Rahmanzadeh et al., 2021) and epilepsy (de Curtis et al., 2021;  
372 Drenthen et al., 2019).

373 Our atlas aggregates histology-derived myeloarchitectural information, depth-  
374 dependent photometric density, as well as corresponding *in vivo* qT1 profiles, together  
375 with myeloarchitectural subtypes categorized into laminar and depth intrusion  
376 patterns of fiber bundles. Notably, the high congruence between histology-derived  
377 quantifications of myelin density through MGL and qT1 lends further biological  
378 validity to this *in vivo* microarchitectural surrogate metric easily implementable in  
379 clinical settings (Hogan, 2017; Waehnert et al., 2016). Notably, recent developments  
380 in advanced imaging sequences, such as myelin water imaging (van der Weijden et  
381 al., 2020) or high-field laminar fMRI (Trampel et al., 2019), allow for an increasingly  
382 detailed study of cortical myelin contents. In this regard, our histology-validated  
383 depth profiles can be harnessed as ground-truth data to validate future *in vivo* imaging  
384 studies investigating myeloarchitecture (O’Muircheartaigh et al., 2019; Yuan et al.,  
385 2021).



386 A few noteworthy points should be considered when applying MYATLAS to new  
387 data. First, as this atlas is based on consensus evidence (*i.e.*, cortical boundaries) from  
388 several studies and does not incorporate information on inter-individual variability of  
389 myeloarchitectural characteristics. This limitation may however be mitigated by  
390 employing our atlas in conjunction with probabilistic cortical mapping approaches,  
391 such as *Julich Brain* (Amunts et al., 2020). Additionally, our digital atlas does not  
392 contain information on potential left-right asymmetries, since the original sources also  
393 do not contain any lateralization information. Nevertheless, a recent quantitative MRI  
394 study investigating myeloarchitectural metrics of the language system revealed  
395 heterogenous lateralization patterns (Yuan et al., 2021): While inferior frontal areas  
396 were left lateralized, the middle and superior temporal gyrus (Heschl's gyrus and  
397 planum temporale) was found to be right lateralized. As such, future research should  
398 therefore be directed at potential functional implications of myeloarchitectural  
399 lateralization patterns in larger cohorts. Additionally, since measures of myelination  
400 density (namely MGL and cortical depth profiles) are unavailable for the occipital  
401 lobe and the insula, a whole-brain neuroimaging correlation remains somewhat  
402 partial. However, due to their high congruence, this limitation could be resolved by  
403 extrapolating MGL from qT1 *in vivo* data, preferably acquired at ultra-high magnetic  
404 field strengths (Sengupta et al., 2018).

405 Future applications of our architectonic mapping framework may include correlations  
406 between myeloarchitectonic density and myelin-related genes (Donkels et al., 2020;  
407 Glasser et al., 2016). For instance, building on our procedures from MGL-qT1 cross-  
408 correlation, it is now possible to relate myelin-related gene expression to  
409 myeloarchitectonic features within individual cortical parcellations. Such efforts may

410 provide further insights on the role of specific genes in health and disease

411 (Rahmanzadeh et al., 2021; Sprooten et al., 2019).

412

## 413 **References**

- 414 Amunts K, Kedo O, Kindler M, Pieperhoff P, Mohlberg H, Shah NJ, Habel U,  
415 Schneider F, Zilles K. 2005. Cytoarchitectonic mapping of the human  
416 amygdala, hippocampal region and entorhinal cortex: intersubject variability  
417 and probability maps. *Anat Embryol (Berl)* **210**:343–352. doi:10.1007/s00429-  
418 005-0025-5
- 419 Amunts K, Mohlberg H, Bludau S, Zilles K. 2020. Julich-Brain: A 3D probabilistic  
420 atlas of the human brain's cytoarchitecture. *Science* **369**:988–992.  
421 doi:10.1126/science.abb4588
- 422 Babayan A, Erbey M, Kumral D, Reinelt JD, Reiter AMF, Röbbig J, Schaare HL,  
423 Uhlig M, Anwander A, Bazin P-L, Horstmann A, Lampe L, Nikulin VV,  
424 Okon-Singer H, Preusser S, Pampel A, Rohr CS, Sacher J, Thöne-Otto A,  
425 Trapp S, Nierhaus T, Altmann D, Arelin K, Blöchl M, Bongartz E, Breig P,  
426 Cesnaite E, Chen S, Cozatl R, Czerwonatis S, Dambrauskaite G, Dreyer M,  
427 Enders J, Engelhardt M, Fischer MM, Forschack N, Golchert J, Goltz L, Guran  
428 CA, Hedrich S, Hentschel N, Hoffmann DI, Huntenburg JM, Jost R,  
429 Kosatschek A, Kundendorf S, Lammers H, Lauckner ME, Mahjoory K,  
430 Kanaan AS, Mendes N, Menger R, Morino E, Näthe K, Neubauer J, Noyan H,  
431 Oligschläger S, Panczyszyn-Trzewik P, Poehlchen D, Putzke N, Roski S,  
432 Schaller M-C, Schieferbein A, Schlaak B, Schmidt R, Gorgolewski KJ,  
433 Schmidt HM, Schrimpf A, Stasch S, Voss M, Wiedemann A, Margulies DS,  
434 Gaebler M, Villringer A. 2019. A mind-brain-body dataset of MRI, EEG,  
435 cognition, emotion, and peripheral physiology in young and old adults. *Sci*  
436 *Data* **6**:180308. doi:10.1038/sdata.2018.308
- 437 Batsch E-G. 1955. Die myeloarchitektonische Untergliederung des Isocortex  
438 parietalis beim Menschen. *J Hirnforsch* **46**.
- 439 Boshkovski T, Kocarev L, Cohen-Adad J, Mišić B, Lehericy S, Stikov N, Mancini M.  
440 2021. The R1-weighted connectome: complementing brain networks with a  
441 myelin-sensitive measure. *Netw Neurosci* **5**:358–372.  
442 doi:10.1162/netn\_a\_00179
- 443 Brockhaus H. 1940. Die Cyto- und Myeloarchitektonik des Cortex claustralis und des  
444 Claustrum beim Menschen. *J Fuer Psychol Neurol* **49**:100.
- 445 Brodmann K. 1907. Beiträge zur histologischen Lokalisation der Grosshirnrinde: Die  
446 Cortexgliederung des Menschen. VI. Verlag von Johann Ambrosius Barth.
- 447 Dale AM, Fischl B, Sereno MI. 1999. Cortical surface-based analysis. I.  
448 Segmentation and surface reconstruction. *NeuroImage* **9**:179–194.  
449 doi:10.1006/nimg.1998.0395
- 450 de Curtis M, Garbelli R, Uva L. 2021. A hypothesis for the role of axon  
451 demyelination in seizure generation. *Epilepsia* **62**:583–595.  
452 doi:10.1111/epi.16824
- 453 Donkels C, Peters M, Núñez MTF, Nakagawa JM, Kirsch M, Vlachos A, Scheiwe C,  
454 Schulze-Bonhage A, Prinz M, Beck J, Haas CA. 2020. Oligodendrocyte  
455 lineage and myelination are compromised in the gray matter of focal cortical  
456 dysplasia type IIa. *Epilepsia* **61**:171–184.  
457 doi:https://doi.org/10.1111/epi.16415
- 458 Drenthen GS, Wald ELAF, Backes WH, Hall MHJAD-V, Hendriksen JGM,  
459 Aldenkamp AP, Vermeulen RJ, Klinkenberg S, Jansen JFA. 2019. Lower

- 460 myelin-water content of the frontal lobe in childhood absence epilepsy.  
461 *Epilepsia* **60**:1689–1696. doi:<https://doi.org/10.1111/epi.16280>
- 462 Edwards LJ, Kirilina E, Mohammadi S, Weiskopf N. 2018. Microstructural imaging  
463 of human neocortex in vivo. *NeuroImage, Microstructural Imaging* **182**:184–  
464 206. doi:10.1016/j.neuroimage.2018.02.055
- 465 Eickhoff SB, Stephan KE, Mohlberg H, Grefkes C, Fink GR, Amunts K, Zilles K.  
466 2005. A new SPM toolbox for combining probabilistic cytoarchitectonic maps  
467 and functional imaging data. *NeuroImage* **25**:1325–1335.  
468 doi:10.1016/j.neuroimage.2004.12.034
- 469 Fischl B. 2012. FreeSurfer. *NeuroImage* **62**:774–781.  
470 doi:10.1016/j.neuroimage.2012.01.021
- 471 Fischl B, Liu A, Dale AM. 2001. Automated manifold surgery: constructing  
472 geometrically accurate and topologically correct models of the human cerebral  
473 cortex. *IEEE Med Imaging* **20**:70–80.
- 474 Fischl B, Salat DH, Kouwe AJW van der, Makris N, Ségonne F, Quinn BT, Dale AM.  
475 2004. Sequence-independent segmentation of magnetic resonance images.  
476 *NeuroImage* **23**:S69–S84. doi:DOI: 10.1016/j.neuroimage.2004.07.016
- 477 Glasser MF, Coalson TS, Robinson EC, Hacker CD, Harwell J, Yacoub E, Ugurbil K,  
478 Andersson J, Beckmann CF, Jenkinson M, Smith SM, Van Essen DC. 2016. A  
479 multi-modal parcellation of human cerebral cortex. *Nature* **536**:171–178.  
480 doi:10.1038/nature18933
- 481 Glasser MF, Van Essen DC. 2011. Mapping human cortical areas in vivo based on  
482 myelin content as revealed by T1- and T2-weighted MRI. *J Neurosci Off J Soc*  
483 *Neurosci* **31**:11597–11616. doi:10.1523/JNEUROSCI.2180-11.2011
- 484 Hogan RE. 2017. Quantitative Measurement of Longitudinal Relaxation Time (qT1)  
485 Mapping in TLE: A Marker for Intracortical Microstructure? *Epilepsy Curr*  
486 **17**:358–360. doi:10.5698/1535-7597.17.6.358
- 487 Holmes CJ, Hoge R, Collins L, Woods R, Toga AW, Evans AC. 1998. Enhancement  
488 of MR Images Using Registration for Signal Averaging. *J Comput Assist*  
489 *Tomogr* **22**:324–333.
- 490 Hong S-J, Bernhardt BC, Caldairou B, Hall JA, Guiot MC, Schrader D, Bernasconi N,  
491 Bernasconi A. 2017. Multimodal MRI profiling of focal cortical dysplasia type  
492 II. *Neurology* **88**:734–742. doi:10.1212/WNL.0000000000003632
- 493 Hong S-J, Bernhardt BC, Schrader DS, Bernasconi N, Bernasconi A. 2016. Whole-  
494 brain MRI phenotyping in dysplasia-related frontal lobe epilepsy. *Neurology*  
495 **86**:643–650. doi:10.1212/WNL.0000000000002374
- 496 Hopf A. 1968. Photometric studies on the myeloarchitecture of the human temporal  
497 lobe. *J Hirnforsch* **10**:285–297.
- 498 Hopf A. 1957. Über die Verteilung myeloarchitektonischer Merkmale in der  
499 Scheitellappenrinde beim Menschen 26.
- 500 Hopf A. 1956. Über die Verteilung myeloarchitektonischer Merkmale in der  
501 Stirnhirnrinde beim Menschen 23.
- 502 Hopf A. 1955. Über die Verteilung myeloarchitektonischer Merkmale in der  
503 isokortikalen Schläfenlappenrinde beim Menschen 19.

- 504 Huntenburg JM, Bazin P-L, Goulas A, Tardif CL, Villringer A, Margulies DS. 2017.  
505 A Systematic Relationship Between Functional Connectivity and Intracortical  
506 Myelin in the Human Cerebral Cortex. *Cereb Cortex* **27**:981–997.  
507 doi:10.1093/cercor/bhx030
- 508 Jovicich J, Czanner S, Greve D, Haley E, Kowalewski A, Gollub R, Kennedy D,  
509 Schmitt F, Brown G, MacFall J, Fischl B, Dale A. 2006. Reliability in multi-  
510 site structural MRI studies: Effects of gradient non-linearity correction on  
511 phantom and human data. *NeuroImage* **30**:436–443. doi:DOI:  
512 10.1016/j.neuroimage.2005.09.046
- 513 Lazari A, Lipp I. 2021. Can MRI measure myelin? Systematic review, qualitative  
514 assessment, and meta-analysis of studies validating microstructural imaging  
515 with myelin histology. *NeuroImage* **230**:117744.  
516 doi:10.1016/j.neuroimage.2021.117744
- 517 Lee KH, Chung K, Chung JM, Coggeshall RE. 1986. Correlation of cell body size,  
518 axon size, and signal conduction velocity for individually labelled dorsal root  
519 ganglion cells in the cat. *J Comp Neurol* **243**:335–346.  
520 doi:10.1002/cne.902430305
- 521 Lorenz S, Weiner KS, Caspers J, Mohlberg H, Schleicher A, Bludau S, Eickhoff SB,  
522 Grill-Spector K, Zilles K, Amunts K. 2017. Two New Cytoarchitectonic Areas  
523 on the Human Mid-Fusiform Gyrus. *Cereb Cortex N Y N 1991* **27**:373–385.  
524 doi:10.1093/cercor/bhv225
- 525 Lutti A, Dick F, Sereno MI, Weiskopf N. 2014. Using high-resolution quantitative  
526 mapping of R1 as an index of cortical myelination. *NeuroImage* **93 Pt 2**:176–  
527 188. doi:10.1016/j.neuroimage.2013.06.005
- 528 Mancini M, Karakuzu A, Cohen-Adad J, Cercignani M, Nichols TE, Stikov N. 2020.  
529 An interactive meta-analysis of MRI biomarkers of myelin. *eLife* **9**:e61523.  
530 doi:10.7554/eLife.61523
- 531 Marques JP, Gruetter R. 2013. New developments and applications of the MP2RAGE  
532 sequence--focusing the contrast and high spatial resolution R1 mapping. *PLoS*  
533 *One* **8**:e69294. doi:10.1371/journal.pone.0069294
- 534 Marques JP, Khabipova D, Gruetter R. 2017. Studying cyto and myeloarchitecture of  
535 the human cortex at ultra-high field with quantitative imaging: R1, R2\* and  
536 magnetic susceptibility. *NeuroImage* **147**:152–163.  
537 doi:10.1016/j.neuroimage.2016.12.009
- 538 Mendes N, Oligschläger S, Lauckner ME, Golchert J, Huntenburg JM, Falkiewicz M,  
539 Ellamil M, Krause S, Baczkowski BM, Cozatl R, Osoianu A, Kumral D, Pool  
540 J, Golz L, Dreyer M, Haueis P, Jost R, Kramarenko Y, Engen H, Ohrnberger  
541 K, Gorgolewski KJ, Farrugia N, Babayan A, Reiter A, Schaare HL, Reinelt J,  
542 Röbbig J, Uhlig M, Erbey M, Gaebler M, Smallwood J, Villringer A,  
543 Margulies DS. 2019. A functional connectome phenotyping dataset including  
544 cognitive state and personality measures. *Sci Data* **6**:180307.  
545 doi:10.1038/sdata.2018.307
- 546 Micheva KD, Wolman D, Mensh BD, Pax E, Buchanan J, Smith SJ, Bock DD. 2016.  
547 A large fraction of neocortical myelin ensheathes axons of local inhibitory  
548 neurons. *eLife* **5**:e15784. doi:10.7554/eLife.15784
- 549 Nieuwenhuys R. 2013. The myeloarchitectonic studies on the human cerebral cortex  
550 of the Vogt–Vogt school, and their significance for the interpretation of

- 551 functional neuroimaging data. *Brain Struct Funct* **218**:303–352.  
552 doi:10.1007/s00429-012-0460-z
- 553 Nieuwenhuys R, Broere CAJ. 2020. A detailed comparison of the cytoarchitectonic  
554 and myeloarchitectonic maps of the human neocortex produced by the Vogt–  
555 Vogt school. *Brain Struct Funct*. doi:10.1007/s00429-020-02150-2
- 556 Nieuwenhuys R, Broere CAJ. 2017. A map of the human neocortex showing the  
557 estimated overall myelin content of the individual architectonic areas based on  
558 the studies of Adolf Hopf. *Brain Struct Funct* **222**:465–480.  
559 doi:10.1007/s00429-016-1228-7
- 560 Nieuwenhuys R, Broere CAJ, Cerliani L. 2015. A new myeloarchitectonic map of the  
561 human neocortex based on data from the Vogt–Vogt school. *Brain Struct*  
562 *Funct* **220**:2551–2573. doi:10.1007/s00429-014-0806-9
- 563 Nord CL, Kim S-G, Callesen MB, Kvamme TL, Jensen M, Pedersen MU, Thomsen  
564 KR, Voon V. 2019. The myeloarchitecture of impulsivity: premature  
565 responding in youth is associated with decreased myelination of ventral  
566 putamen. *Neuropsychopharmacol Off Publ Am Coll Neuropsychopharmacol*  
567 **44**:1216–1223. doi:10.1038/s41386-019-0343-6
- 568 O’Brien KR, Kober T, Hagmann P, Maeder P, Marques J, Lazeyras F, Krueger G,  
569 Roche A. 2014. Robust T1-Weighted Structural Brain Imaging and  
570 Morphometry at 7T Using MP2RAGE. *PLoS ONE* **9**.  
571 doi:10.1371/journal.pone.0099676
- 572 O’Muircheartaigh J, Vavasour I, Ljungberg E, Li DKB, Rauscher A, Levesque V,  
573 Garren H, Clayton D, Tam R, Traboulsee A, Kolind S. 2019. Quantitative  
574 neuroimaging measures of myelin in the healthy brain and in multiple  
575 sclerosis. *Hum Brain Mapp* **40**:2104–2116. doi:10.1002/hbm.24510
- 576 Pijnenburg R, Scholtens LH, Ardesch DJ, de Lange SC, Wei Y, van den Heuvel MP.  
577 2021. Myelo- and cytoarchitectonic microstructural and functional human  
578 cortical atlases reconstructed in common MRI space. *NeuroImage*  
579 **239**:118274. doi:10.1016/j.neuroimage.2021.118274
- 580 Rahmzadeh R, Lu P-J, Barakovic M, Weigel M, Maggi P, Nguyen TD, Schiavi S,  
581 Daducci A, La Rosa F, Schaedelin S, Absinta M, Reich DS, Sati P, Wang Y,  
582 Cuadra MB, Radue E-W, Kuhle J, Kappos L, Granziera C. 2021. Myelin and  
583 axon pathology in multiple sclerosis assessed by myelin water and multi-shell  
584 diffusion imaging. *Brain*. doi:10.1093/brain/awab088
- 585 Royer J, Paquola C, Larivière S, Vos de Wael R, Tavakol S, Lowe AJ, Benkarim O,  
586 Evans AC, Bzdok D, Smallwood J, Frauscher B, Bernhardt BC. 2020.  
587 Myeloarchitecture gradients in the human insula: Histological underpinnings  
588 and association to intrinsic functional connectivity. *NeuroImage* **216**:116859.  
589 doi:10.1016/j.neuroimage.2020.116859
- 590 Scholtens LH, de Reus MA, de Lange SC, Schmidt R, van den Heuvel MP. 2018. An  
591 MRI Von Economo – Koskinas atlas. *NeuroImage, Segmenting the Brain*  
592 **170**:249–256. doi:10.1016/j.neuroimage.2016.12.069
- 593 Scholtens LH, de Reus MA, van den Heuvel MP. 2015. Linking contemporary high  
594 resolution magnetic resonance imaging to the von economo legacy: A study  
595 on the comparison of MRI cortical thickness and histological measurements of  
596 cortical structure. *Hum Brain Mapp* **36**:3038–3046. doi:10.1002/hbm.22826



- 597 Sengupta S, Fritz FJ, Harms RL, Hildebrand S, Tse DHY, Poser BA, Goebel R,  
598 Roebroek A. 2018. High resolution anatomical and quantitative MRI of the  
599 entire human occipital lobe ex vivo at 9.4T. *NeuroImage*, Neuroimaging with  
600 Ultra-high Field MRI: Present and Future **168**:162–171.  
601 doi:10.1016/j.neuroimage.2017.03.039
- 602 Smith GE. 1927. Die Cytoarchitektonik der Hirnrinde des erwachsenen Menschen. *J*  
603 *Anat* **61**:264–266.
- 604 Sprooten E, O’Halloran R, Dinse J, Lee WH, Moser DA, Doucet GE, Goodman M,  
605 Krinsky H, Paulino A, Rasgon A, Leibus E, Balchandani P, Inglese M, Frangou  
606 S. 2019. Depth-dependent intracortical myelin organization in the living  
607 human brain determined by in vivo ultra-high field magnetic resonance  
608 imaging. *NeuroImage* **185**:27–34. doi:10.1016/j.neuroimage.2018.10.023
- 609 Strasburger EH. 1937. Die myeloarchitektonische Gliederung des Stirnhirns beim  
610 Menschen und Schimpansen 42.
- 611 Stüber C, Morawski M, Schäfer A, Labadie C, Wähnert M, Leuze C, Streicher M,  
612 Barapatre N, Reimann K, Geyer S, Spemann D, Turner R. 2014. Myelin and  
613 iron concentration in the human brain: a quantitative study of MRI contrast.  
614 *NeuroImage* **93 Pt 1**:95–106. doi:10.1016/j.neuroimage.2014.02.026
- 615 Talairach J, Tournoux P, Missir O. 1993. Referentially Oriented Cerebral MRI  
616 Anatomy: An Atlas of Stereotaxic Anatomical Correlations for Gray and  
617 White Matter. G. Thieme Verlag.
- 618 Tomassy GS, Berger DR, Chen H-H, Kasthuri N, Hayworth KJ, Vercelli A, Seung  
619 HS, Lichtman JW, Arlotta P. 2014. Distinct profiles of myelin distribution  
620 along single axons of pyramidal neurons in the neocortex. *Science* **344**:319–  
621 324. doi:10.1126/science.1249766
- 622 Trampel R, Bazin P-L, Pine K, Weiskopf N. 2019. In-vivo magnetic resonance  
623 imaging (MRI) of laminae in the human cortex. *NeuroImage* **197**:707–715.  
624 doi:10.1016/j.neuroimage.2017.09.037
- 625 Triarhou LC. 2007. Constantin von Economo (1876–1931). *J Neurol* **254**:550–551.  
626 doi:10.1007/s00415-006-0308-7
- 627 van der Weijden CWJ, García DV, Borra RJH, Thurner P, Meilof JF, van Laar P-J,  
628 Dierckx PRAJO, Gutmann IW, de Vries EFJ. 2020. Myelin quantification  
629 with MRI: A systematic review of accuracy and reproducibility. *NeuroImage*  
630 117561. doi:10.1016/j.neuroimage.2020.117561
- 631 Vogt C, Vogt O. 1919. Allgemeine Ergebnisse unserer Hirnforschung.
- 632 Waehnert MD, Dinse J, Schäfer A, Geyer S, Bazin P-L, Turner R, Tardif CL. 2016. A  
633 subject-specific framework for in vivo myeloarchitectonic analysis using high  
634 resolution quantitative MRI. *NeuroImage* **125**:94–107.  
635 doi:10.1016/j.neuroimage.2015.10.001
- 636 Waehnert MD, Dinse J, Weiss M, Streicher MN, Waehnert P, Geyer S, Turner R,  
637 Bazin P-L. 2014. Anatomically motivated modeling of cortical laminae.  
638 *NeuroImage*, In-vivo Brodmann Mapping of the Human Brain **93**:210–220.  
639 doi:10.1016/j.neuroimage.2013.03.078
- 640 Weiskopf N, Mohammadi S, Lutti A, Callaghan MF. 2015. Advances in MRI-based  
641 computational neuroanatomy: from morphometry to in-vivo histology. *Curr*  
642 *Opin Neurol* **28**:313–322. doi:10.1097/WCO.0000000000000222

- 643 Yuan D, Luo D, Kwok VPY, Zhou Y, Tian H, Yu Q, An J, Gao J-H, Qiu S, Tan LH.  
644 2021. Myeloarchitectonic Asymmetries of Language Regions in the Human  
645 Brain. *Cereb Cortex N Y N 1991* **31**:4169–4179. doi:10.1093/cercor/bhab076
- 646 Zhang H, Schneider T, Wheeler-Kingshott CA, Alexander DC. 2012. NODDI:  
647 Practical in vivo neurite orientation dispersion and density imaging of the  
648 human brain. *NeuroImage* **61**:1000–1016.  
649 doi:10.1016/j.neuroimage.2012.03.072
- 650 Zilles K, Amunts K. 2010. Centenary of Brodmann’s map--conception and fate. *Nat*  
651 *Rev Neurosci* **11**:139–145. doi:10.1038/nrn2776
- 652 Zilles K, Palomero-Gallagher N, Amunts K. 2015. Myeloarchitecture and Maps of the  
653 Cerebral Cortex In: Toga AW, editor. *Brain Mapping*. Waltham: Academic  
654 Press. pp. 137–156. doi:10.1016/B978-0-12-397025-1.00209-8  
655
- 656



657 **Figures**

658

659 Figures 1

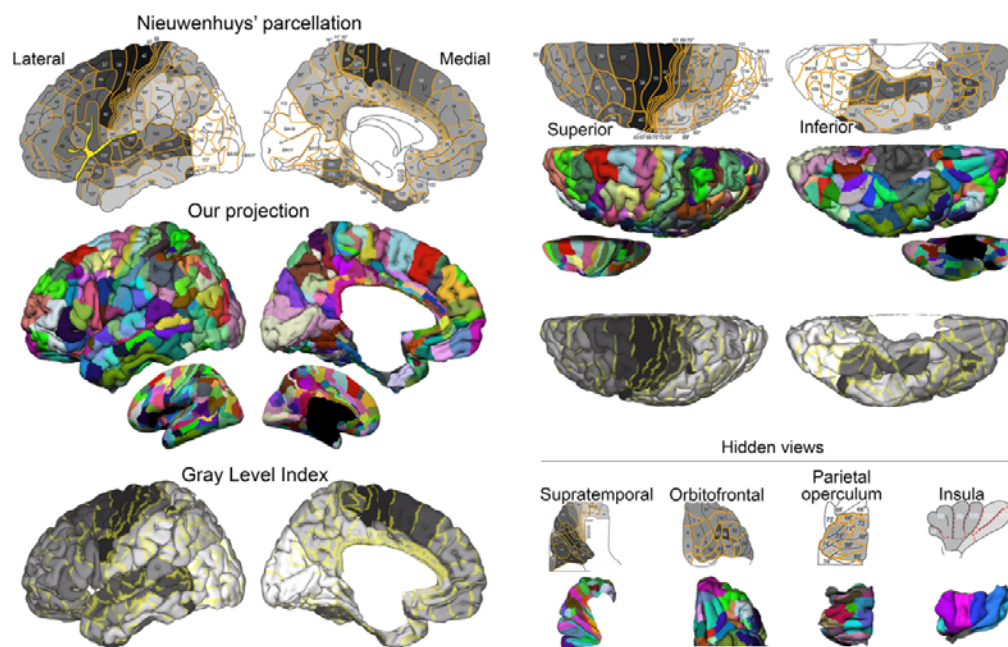

660

661 **FIGURE 1. Construction of the 3D myeloarchitectonic MNI atlas (MYATLAS).** Manual  
662 cortical parcellations (based on the topological transformation of Vogt-Vogt parcellation) across  
663 view planes (lateral, medial, superior, inferior; on pial and inflated surfaces), with the 3D  
664 projection and mean gray level index measuring the degrees of myelination. Hidden areas within  
665 the orbitofrontal region, the supratemporal lobe, and the parietal operculum were labeled by  
666 extracting view planes similar to the original publication; they were then merged back with the  
667 whole-brain surface once segmentations were finished (panel on the right bottom).

668

669 **Figure 2**

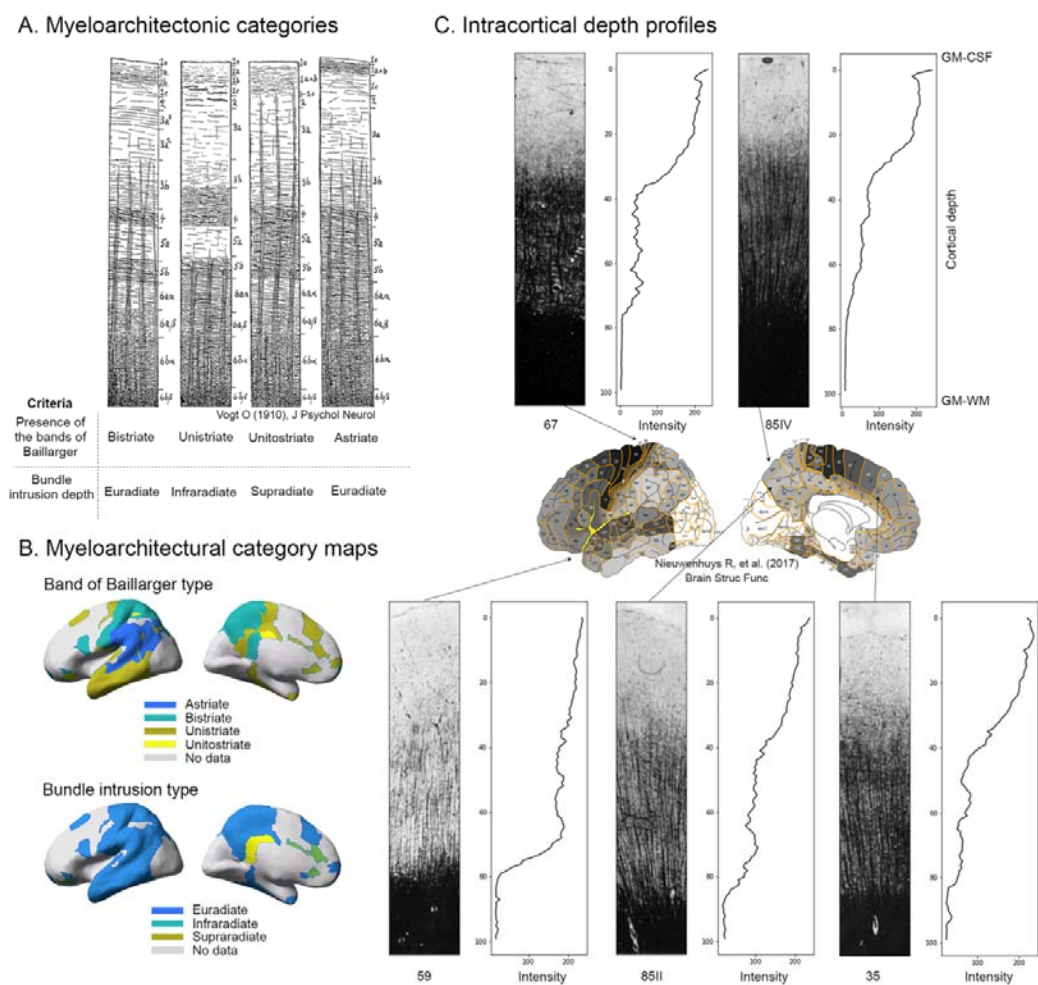

670

671 **Figure 2. Intracortical depth profiling based on Vogt-Hopf histological data.** A) Categories of  
 672 myeloarchitectonic features based on laminar and bundle intrusion patterns; B) Mapping of feature  
 673 information onto the cortical surface; *no data* indicate subtype information unavailable from the  
 674 original literature. C) Examples of myelin-stained cortical areas across full cortical depth with their  
 675 corresponding depth profiles (maps shown in **Supplementary Material 1**).

676

677

678 **Figure 3**

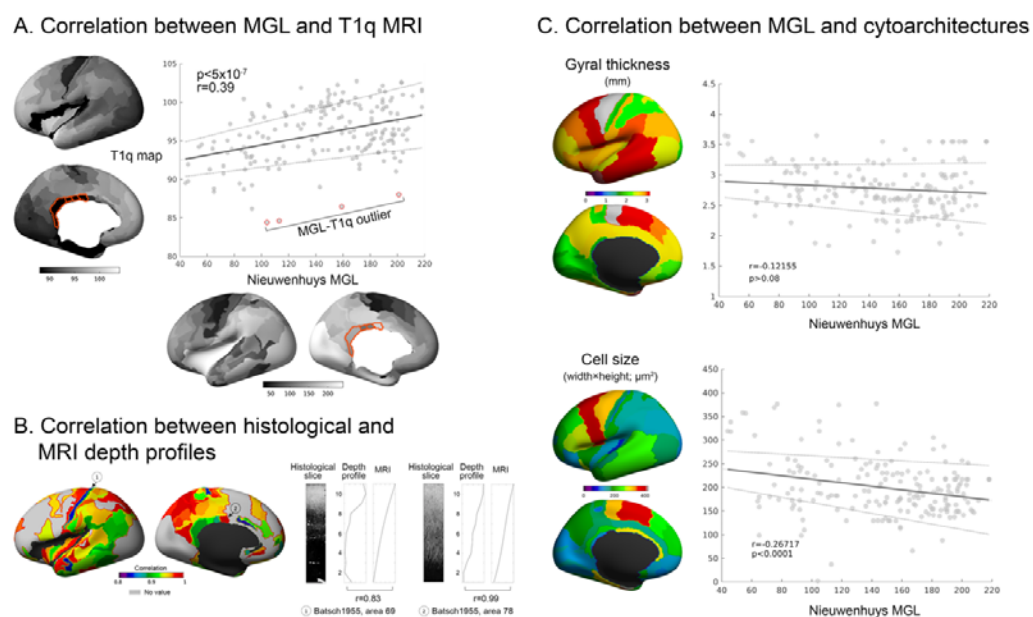

679

680 **Figure 3. Correlation of *in vivo* MRI markers and cytoarchitectural features.** **A)** Whole-brain  
 681 spatial correlation between *in vivo* quantitative T1w MRI (T1q) and mean gray level (MGL) index.  
 682 Outliers ( $>\pm 2SD$  qT1) in the posterior cingulate are in red). **B)** Whole-brain depth profile correlation  
 683 between qT1 and photodensitometry-derived cortical myelin content; only areas with available depth  
 684 profiles are presented. Two areas with the highest and lowest correlation between histology and qT1  
 685 MRI are given as examples. **C)** Whole-brain spatial correlation between MGL and cytoarchitectural  
 686 features derived from von Economo-Koskinas literature (*i.e.*, gyral dome thickness and cell size).  
 687

688

689 **Supplementary Table 1 – Label indices for discordant views across brain areas**

| <b>Area index</b> | <b>Discordant views<br/>(See Figure 1C)</b> | <b>View followed</b>    |
|-------------------|---------------------------------------------|-------------------------|
| 109               | Lateral, inferior                           | inferior                |
| 111               | Lateral, medial                             | Split into two segments |
| 112               | Lateral, medial                             | Split into two segments |
| 120               | Lateral, medial                             | medial                  |
| 127               | Lateral, inferior                           | lateral                 |
| 128               | Lateral, inferior                           | Lateral                 |
| 175               | Medial, inferior                            | inferior                |
| 176               | Medial, inferior                            | inferior                |
| 178               | Medial, inferior                            | inferior                |

690

691 **Supplementary Table 2 –FreeSurfer command line code**

```
#!/bin/bash

CASE=${1}
SRCDIR=${2} # ex) /[downloaded file path]/COLIN27_FS/label/Vogt_Areas_final
TRGDIR=${3} # ex) [your directory for individual freesurfer processing]
FILEDIR=${4} # ex) [downloaded file path]
print=""

label_name=( 1 2 3 4 5 6 8 9 10 11 12 13 14 15 16 17 18 19 20 21 22 23 24 25 26 27 28 30
31 32 33 34 35 36 37 38 39 40 41 42 43 44 45 46 47 48 49 50 51 52 53 54 55 56 57 58 59
60 61 62 63 64 65 66 67 67.III 67.IV 68.I 68.II 68.III 69 70.m 70.I 70.II 71.m 71.I 71.II 72
73.I 73.II 73.III 74.I 74.II 75.m 75.s 75.i 76.s 76.I 77 78 79 80 81 82 83.I 83.II 83.III 83.IV
84 85.I 85.II 85.III 85.IV 86 87 88.a 88.p 89.a 89.m 89.p 89.ip 89.t 90.a 90.m 90.p 90.ip
90.t 90.o 91 92 93 94 95 96 97 98 99 100 101 102 103 104 105 106 107 108 109 110 111.I
111.m 112.I 112.m 113 114 115 116 117 118 119 BA18 BA17 120 121 122 123 124 125
126 127 128 129 130 131 132 133 134 135 136 137 138 139 140 141 142 143 144 145 146
147 148 149 150 151 152 153 154 155 156 157 158 159 160 161 162 163 164 165 166 167
168 169 170 171 172 173 174 175 176 177 178 179 180 181 182 )

if [ ! -e ${TRGDIR}/${CASE}/label/rh.vogt_vogt.annot ]; then

    ${print} mkdir ${TRGDIR}/${CASE}/label/Vogt_Areas_final
    for label in "${label_name[@]}"
    do

        ${print} mri_label2label --srclabel ${SRCDIR}/rh.${label}.label --
        srcsubject colin27 --trglabel
        ${TRGDIR}/${CASE}/label/Vogt_Areas_final/rh.${label}.label --
        trgsurface ${CASE} --regmethod surface --hemi rh

    done

    mris_label2annot --s ${CASE} --h rh --ctab ${FILEDIR}/vogt.ctab --a vogt_vogt
    --ldir ${TRGDIR}/${CASE}/label/Vogt_Areas_final/ --nhits
    overlapped_vertex.mgh --no-unknown

fi
```

692
